# Supplementary material for: Highly dispersed ultrafine Ru nanoparticles on a honeycomb-like N-doped carbon matrix with modified rectifying contact for enhanced electrochemical hydrogen evolution
Source: Royal Society of Chemistry journal article supplement (doi:10.1039/d4nr02404d), 2024-01-01
Supplement: d4nr02404d1.pdf [file d4nr02404d1.pdf]

## Supporting Information

### **Highly dispersed ultrafine Ru nanoparticles on the honeycomb-like N-doped carbon matrix with modified rectifying contact for enhanced electrochemical hydrogen evolution**

Mingxin Pang,<sup>+[a]</sup> Yu Fang,<sup>+[a]</sup> Lizhang Chen,<sup>[a]</sup> Ruoxu Sun,<sup>[a]</sup> Xinyu Li,<sup>[a]</sup> Huan Pang,<sup>[b]</sup>  
Songtao Zhang,<sup>[c]</sup> Lin Xu,<sup>\*[a]</sup> Dongmei Sun<sup>\*[a]</sup> and Yawen Tang<sup>[a]</sup>

[a] Jiangsu Key Laboratory of New Power Batteries, Jiangsu Collaborative Innovation Center of Biomedical Functional Materials, School of Chemistry and Materials Science, Nanjing Normal University, Nanjing 210023, P. R. China

[b] School of Chemistry and Chemical Engineering, Yangzhou University, Yangzhou 225009, PR China

[c] Testing Center, Yangzhou University, Yangzhou 225009, PR China

[+] These authors contributed equally to this work.

---

## Experimental Section

### Reagents and chemicals

Sodium chloride (NaCl), gluconol (C<sub>6</sub>H<sub>12</sub>O<sub>6</sub>), and hydroxylamine hydrochloride (NH<sub>2</sub>OH·HCl) were supplied by Sinopharm Chemical Reagent Co., Ltd. Ruthenium (III) chloride trihydrate (RuCl<sub>3</sub>·xH<sub>2</sub>O) was provided by Shanghai Deb Biotechnology Co., LTD. Pt/C (20 wt.%) and RuO<sub>2</sub> were bought from Johnson Matthey Chemicals Co., Ltd. All of the chemical reagents were analytical grade and directly used as received without further purification.

### Materials preparation

In a typical procedure, a solution including 6.5 mg of RuCl<sub>3</sub>·xH<sub>2</sub>O, 690 mg of NH<sub>2</sub>OH·HCl and 1 g of NaCl dissolved in 40 mL of deionized water was named as solution A. 500 mg of glucose powder was dissolved in 40 mL to form solution B. Then, solution A was added into solution B drop by drop under stirring, and the mixture was named as solution C. The precursors can be obtained by ultrasonic solution C for 1 h and dried under oven at 60 °C. Then, the recrystallized product prepared was transferred into a ceramic boat and then heated up to 800 °C with a ramp rate of 5 °C·min<sup>-1</sup> and maintained for 4 h under the flowing nitrogen atmosphere. Finally, the final Ru NPs@HNC product was obtained by washing with deionized water for several times and finally drying under a vacuum oven at 60 °C.

For comparison, the HNC, Ru NPs@HC, and Ru NPs@NCNSs were also fabricated under the identical synthetic procedure except for the addition of RuCl<sub>3</sub>·xH<sub>2</sub>O, NH<sub>2</sub>OH·HCl, and NaCl, respectively.

---

## **Materials characterization**

X-ray diffraction (XRD) pattern was performed on a Rigaku D/max-RC diffractometer with a Cu K $\alpha$  radiation ( $\lambda = 0.15406$  nm). Scanning electron microscopy (SEM) measurement was carried out on a Hitachi S5500 scanning electron microscope. Transmission electron microscopy (TEM), high-resolution transmission electron microscopy (HRTEM), and energy-dispersive X-ray spectroscopy (EDX) mapping images were performed on a JEOL JEM-2010F TEM operated at an accelerating voltage of 200 kV. Raman test was conducted on a Raman spectrometer (Lab RAM HR800,  $\lambda = 514$  nm). N<sub>2</sub> sorption measurement was investigated on a Micromeritics ASAP 2020 apparatus. X-ray photoelectron spectroscopy (XPS) and ultraviolet photoelectron spectroscopy (UPS) analyses were operated on a Thermo VG Scientific ESCALAB 250 spectrometer using Al K $\alpha$  X-ray radiation and He I resonance lines (21.2 eV), respectively. Thermogravimetric analysis (TGA) was carried out on a Netzsch SSTA 449C thermal analyzer with a ramp rate of 10 °C min<sup>-1</sup> under air atmosphere. Low-temperature N<sub>2</sub> adsorption measurements were performed using Micromeritics ASAP 2050 instrument.

## **Electrochemical Measurements**

Electrochemical performances of electrocatalysts were evaluated by a three-electrode system connected with a DH7002A (Jiangsu Donghua Analytical Instrument CoLtd.) electrochemical workstation. A saturated calomel electrode (SCE), a carbon rod and a glassy carbon electrode (GCE) are served as the reference electrode, counter electrode and working electrode, respectively. The catalyst ink was prepared by

---

dispersing 5 mg of catalysts in 1.0 mL of ethanol solution (the volume ratio of water to ethanol is 3:1) by ultrasonication for 30 min. Then, 8  $\mu\text{L}$  of the catalyst ink was dropped on the polished GCE surface. After that, 2  $\mu\text{L}$  of Nafion (5 wt.%, Sigma-Aldrich) was loaded on the catalysts modified GCE surface and dried for next electrochemical test. All potentials were converted to a reversible hydrogen electrode (RHE) based on the following equation:  $E_{\text{RHE}} = E_{\text{SCE}} + 0.0592 \text{ pH} + 0.242$ . The hydrogen evolution reaction (HER) measurements were evaluated by linear sweep voltammetry (LSV) corrected against Ohmic potential drop ( $iR$ ) losses in  $\text{N}_2$ -saturated 1.0 M KOH solution at scan rate of  $5 \text{ mV s}^{-1}$ . Double-layer capacitance ( $C_{\text{dl}}$ ) was determined by a series of cyclic voltammetry (CV) tests within a potential range of 0.15-0.25 V vs. reversible hydrogen electrode (RHE) at different scan rates from 20 to  $100 \text{ mV s}^{-1}$  in 1.0 M KOH solution. The LSV curves for HER were obtained in the potential range of 1.0-1.9 V with a scan rate of  $1 \text{ mV s}^{-1}$ . Electrochemical impedance spectroscopy (EIS) measurements were measured at a frequency between 0.01 Hz and  $10^5$  Hz. The stability measurements were evaluated by continuous CV scanning 3000 cycles at a scan rate of  $0.1 \text{ V s}^{-1}$ .

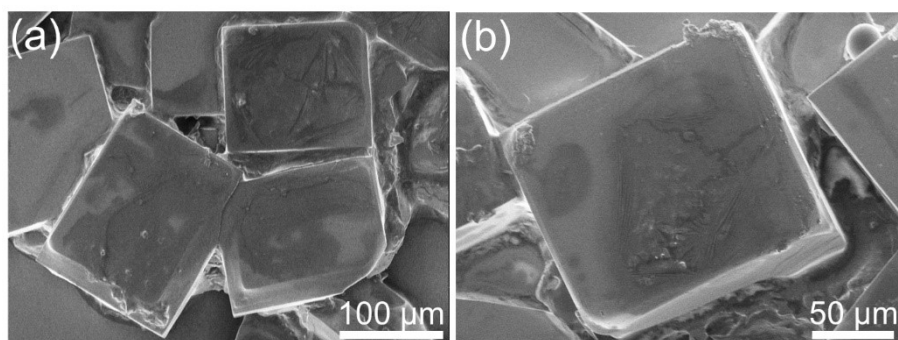

Figure S1. (a)-(b) SEM image of the formed  $\text{Ru}^{3+}/\text{C}_6\text{H}_{12}\text{O}_6@\text{NaCl}$ .

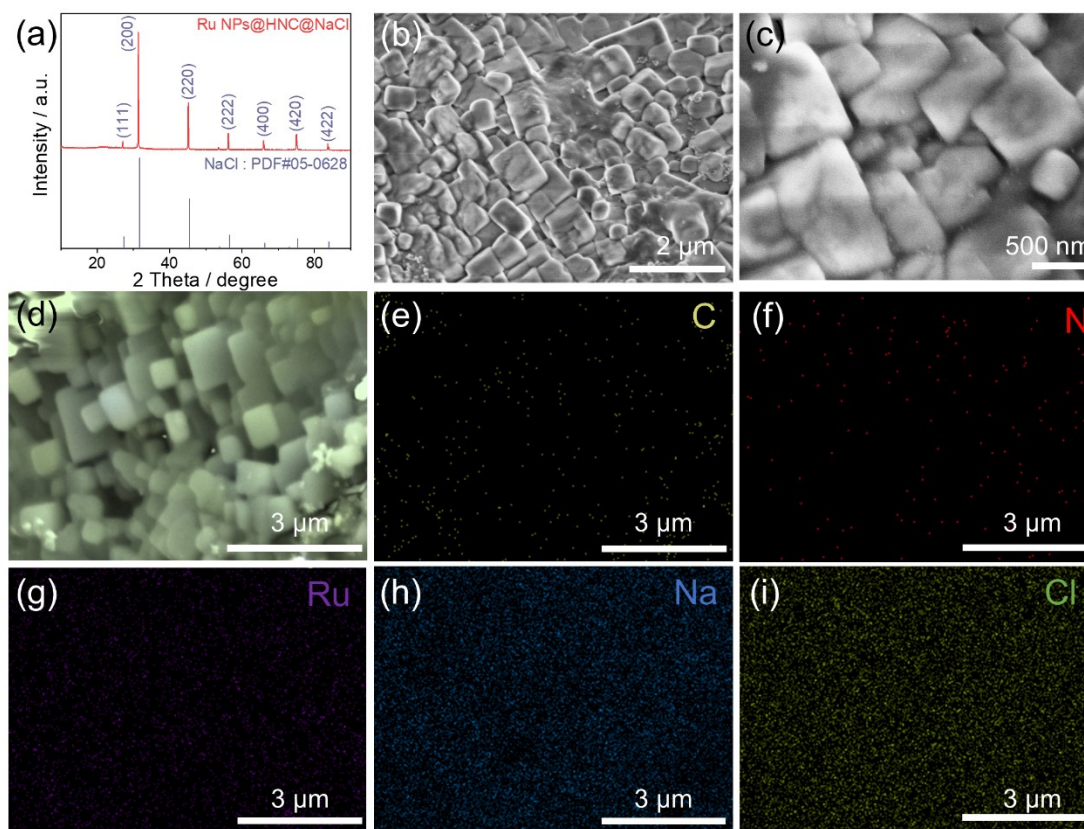

Figure S2 (a) XRD pattern, (b)-(c) SEM images and (d)-(i) elemental mapping images of the formed  $\text{Ru NPs@HNC@NaCl}$ .

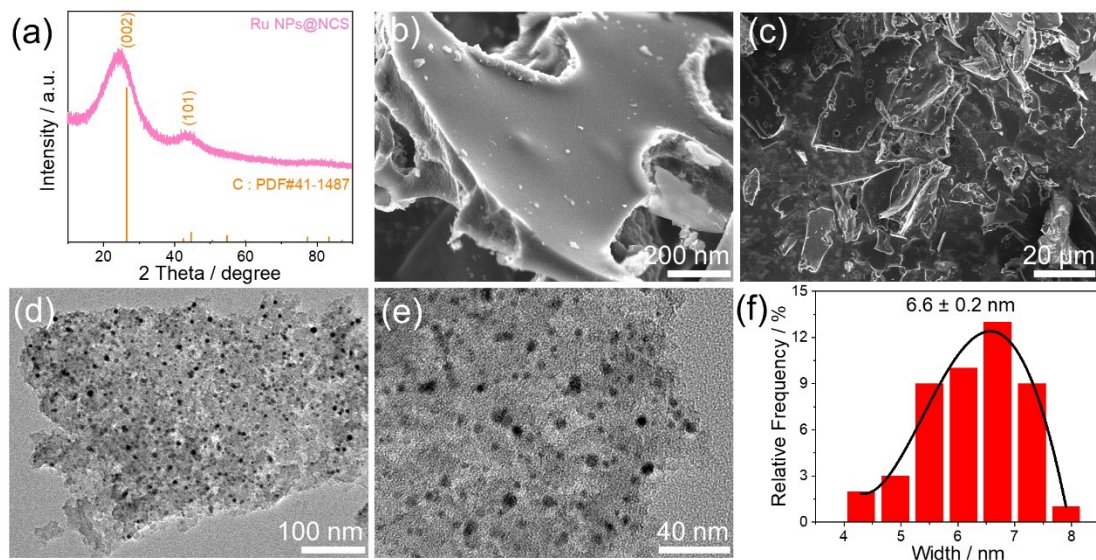

Figure S3. (a) XRD pattern, (b)-(c) SEM images, (d)-(e) TEM images and particle size distribution pattern of the formed Ru NPs@NCS.

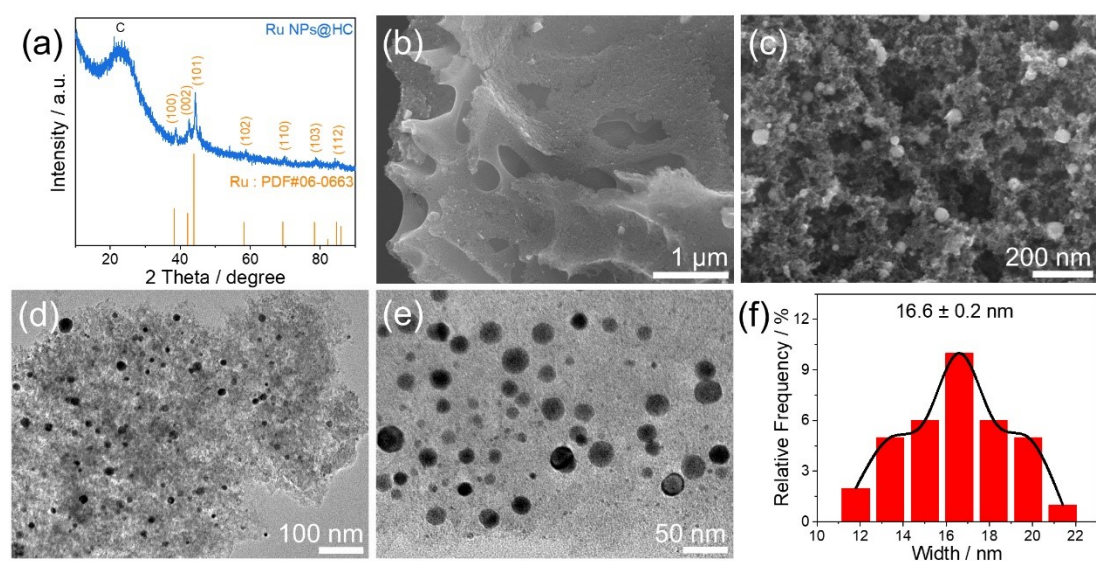

Figure S4. (a) XRD pattern, (b)-(c) SEM images, (d)-(e) TEM images and particle size distribution pattern of the formed Ru NPs@HC.

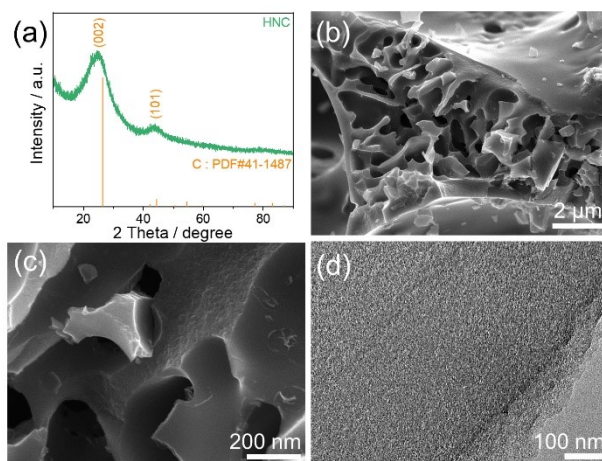

Figure S5 (a) XRD pattern, (b)-(c) SEM images, and (d) TEM image of the formed HNC.

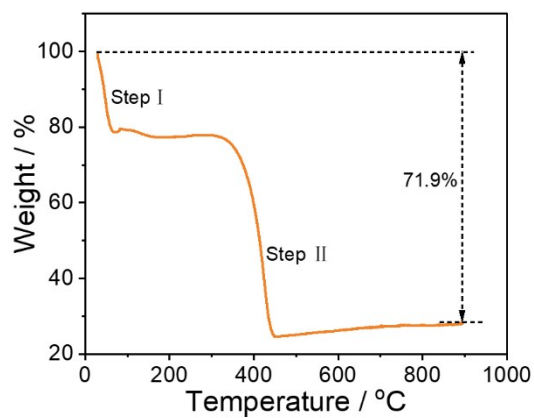

Figure S6 TGA curve of Ru NPs@HNC.

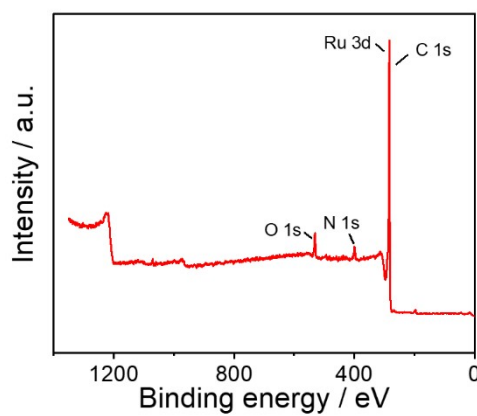

Figure S7 XPS survey scan spectrum of Ru NPs@HNC.

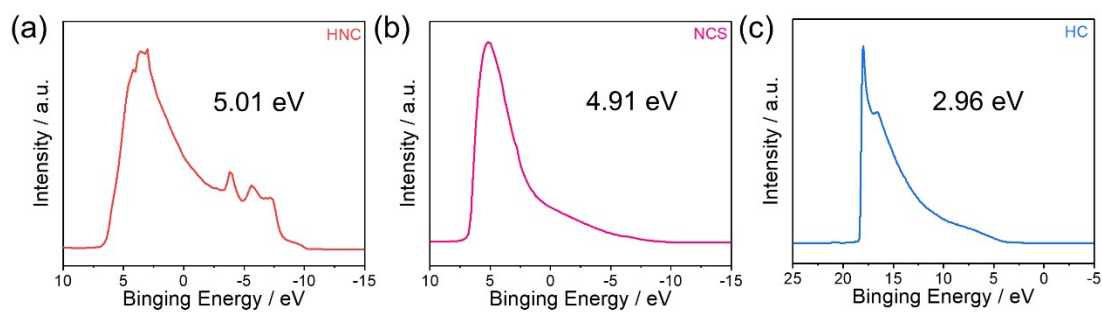

Figure S8 UPS spectra of pristine HNC, NCS and HC.

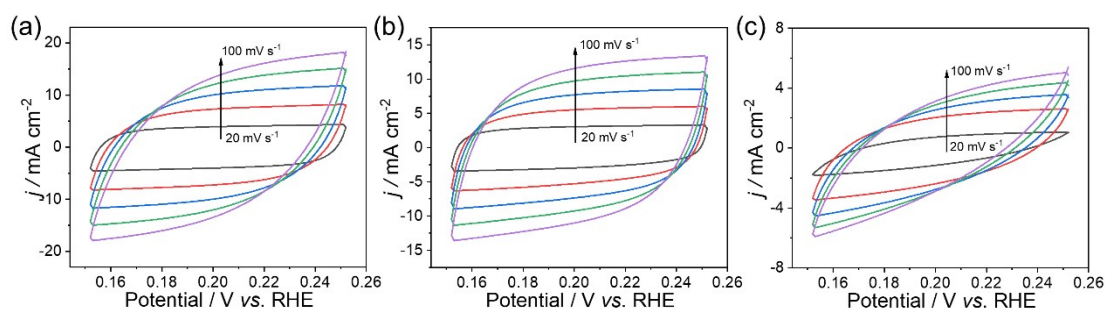

Figure S9. CV curves of (a) Ru NPs@HNC, (b) Ru NPs@HC, (c) Ru NPs@NCNSs in 1.0 M KOH at different scan rates of 20, 40, 60, 80, and 100  $\text{mV s}^{-1}$ .

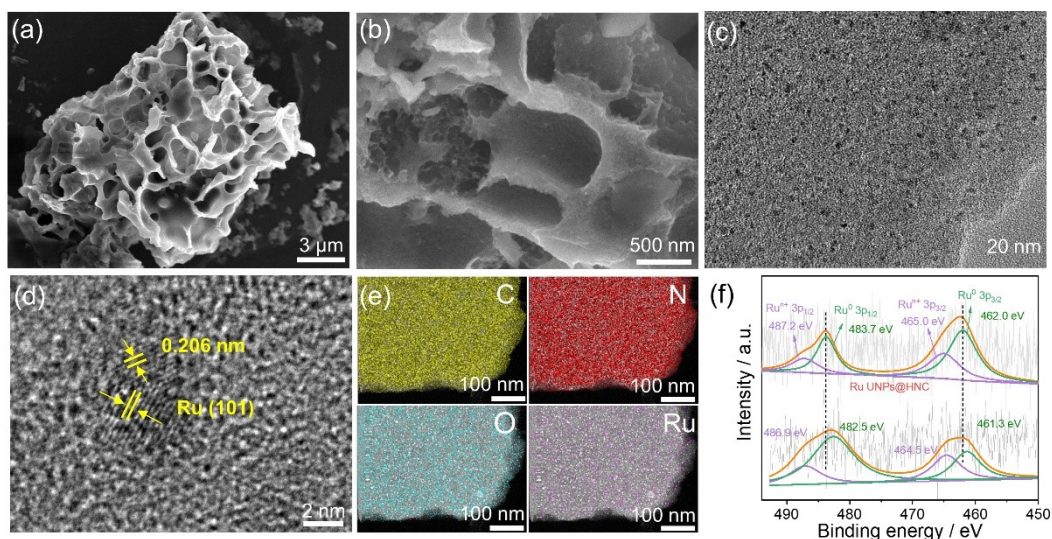

Figure S10. (a)-(b) SEM images, (c) TEM image, (d) HRTEM image and (e) elemental mapping images of Ru NPs@HNC after 3000 cycles CV test. (f) Ru 3p XPS spectra of Ru NPs@HNC before and after 3000 cycles CV test.



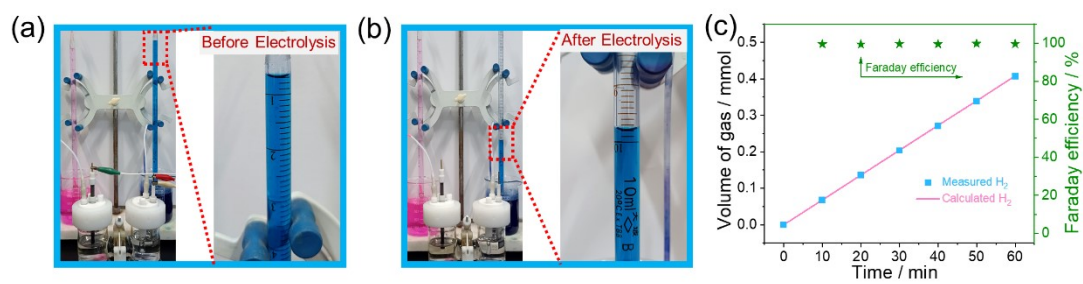

Figure S11 (a)-(b) Digital photographs of water splitting electrolyzer before and after the electrolysis. (c) Experimental and theoretical yields of H<sub>2</sub> gases during water splitting at a current density of 20 mA cm<sup>-2</sup> and corresponding faradaic efficiency.

---

Table S1. The Ru content of Ru NPs@HNC measured by inductively coupled plasma atomic emission spectroscopy (ICP-AES).

| Sample     | wt. % |
|------------|-------|
| Ru NPs@HNC | 2.19% |

---

Table S2. The work functions of HNC, NCNSs, HC.

---

| Sample | work function |
|--------|---------------|
| HNC    | 5.01          |
| NCNSs  | 4.91          |
| HC     | 2.96          |

---

Table S3 Comparisons of HER activity of Ru NPs@HNC with some previously reported Ru-based catalysts in 1.0 M KOH solution.

| Catalysts                                 | $\eta_j = 10 \text{ mA cm}^{-2}$<br>/mV | Tafel slope<br>/mV dec <sup>-1</sup> | Reference                                                |
|-------------------------------------------|-----------------------------------------|--------------------------------------|----------------------------------------------------------|
| <b>Ru NPs@HNC</b>                         | <b>28</b>                               | <b>57.4</b>                          | <b>This work</b>                                         |
| (Ru-Co) <sub>x</sub> /CC                  | 44.1                                    | 23.5                                 | <i>Angew. Chem. Int. Ed.</i> , 2020, 59, 17219.          |
| Ru-NiCoP/NF                               | 44                                      | 45.4                                 | <i>Appl. Catal. B: Environ.</i> , 2020, 279, 119396.     |
| Ru <sub>1</sub> Ni <sub>1</sub> -NCNFs    | 35                                      | 30                                   | <i>Adv. Sci.</i> , 2020, 7, 1901833.                     |
| Sr <sub>2</sub> RuO <sub>4</sub>          | 61                                      | 51                                   | <i>Nat. Commun.</i> , 2019, 10, 149.                     |
| Ru-MoS <sub>2</sub> /CC                   | 41                                      | 114                                  | <i>Appl. Catal. B</i> , 2019, 249, 91-97.                |
| Ru/NC-400                                 | 39                                      | 49                                   | <i>Adv. Funct. Mater.</i> , 2021, 31, 2100698.           |
| Ru <sub>2,0</sub> /HNCS                   | 72                                      | 67                                   | <i>Mater. Today Phys.</i> , 2021, 16, 100300.            |
| Ru <sub>1</sub> CoP/CDs                   | 51                                      | 73.4                                 | <i>Angew. Chem. Int. Ed.</i> , 2021, 60, 7234.           |
| Sr <sub>2</sub> RuO <sub>4</sub>          | 61                                      | 51                                   | <i>Nat. Commun.</i> , 2019, 10, 149.                     |
| Ru-Ru <sub>2</sub> P/PC-2                 | 43.4                                    | 35.1                                 | <i>J. Mater. Chem. A</i> , 2019, 7, 5621-5625.           |
| RuP <sub>2</sub> @NPC                     | 52                                      | 69                                   | <i>Angew. Chem. Int. Edit.</i> , 2017, 129, 11717-11722. |
| NiRu@NC                                   | 32                                      | 64                                   | <i>J. Mater. Chem. A</i> , 2018, 6, 1376.                |
| Ru/Co <sub>4</sub> N-CoF <sub>2</sub>     | 53                                      | 144.1                                | <i>Chem. Eur. J.</i> , 2021, 414, 128865.                |
| Ru-Co <sub>3</sub> O <sub>4</sub> -NiO-NF | 44                                      | 53.9                                 | <i>Chem. Eur. J.</i> , 2021, 426, 131300.                |
| M-Co NPs@Ru<br>SAs/NC                     | 34                                      | 55                                   | <i>Small</i> , 2021, 17, 2105231.                        |
| Ru-NPs/SAs@N-TC                           | 97                                      | 58                                   | <i>Adv. Funct. Mater.</i> , 2020, 30, 2003007.           |
| Ru/TiN-300                                | 38                                      | 39                                   | <i>Carbon Energy</i> , 2023, e391.                       |
| Ni <sub>5</sub> P <sub>4</sub> -Ru        | 54                                      | 52                                   | <i>Adv. Mater.</i> , 2020, 1906972.                      |
| Ru-MoS <sub>2</sub> /CNT                  | 50                                      | 62                                   | <i>Adv. Sci.</i> , 2019, 6, 1900090.                     |
| Ru-WO <sub>2.72</sub>                     | 40                                      | 50                                   | <i>Appl. Catal. B</i> , 2022, 308, 121229.               |

Table S4. Comparisons of overall water splitting performance of Ru NPs@HNC with those recently reported Ru-based electrocatalysts in 1.0 M KOH solution.

| Catalysts                                      | $\eta_{10}$<br>(V vs. RHE) | Reference                                       |
|------------------------------------------------|----------------------------|-------------------------------------------------|
| <b>Ru NPs@HNC</b>                              | <b>1.557</b>               | <b>This work</b>                                |
| Ru-SnS <sub>2</sub> /CC-10                     | 1.576                      | <i>Ind. Eng. Chem. Res.</i> , 2022, 61, 382.    |
| Ru-FeRu@C/NC                                   | 1.63                       | <i>Chem. Eng. J.</i> , 2022, 437, 135456.       |
| Ru <sub>0.7</sub> Co <sub>0.3</sub> aerogel/CC | 1.587                      | <i>J. Power Sources</i> , 2021, 514, 230600.    |
| Ru <sub>1</sub> Co <sub>2</sub> NPs            | 1.59                       | <i>ACS Appl. Energy Mater.</i> , 2020, 3, 1869. |
| Ru-Co <sub>2</sub> P@Ru-N-C                    | 1.56                       | <i>Adv. Funct. Mater.</i> , 2024, 2316709.      |
| RuP/CoNiP <sub>4</sub> O <sub>12</sub>         | 1.56                       | <i>Appl. Catal. B</i> , 2023, 328, 122447.      |
| (Ru-Co)O <sub>x</sub> -350                     | 1.57                       | <i>Chem. Eng. J.</i> , 2021, 420, 129805.       |
| Ru-FeRu@C/NC                                   | 1.63                       | <i>Chem. Eng. J.</i> , 2022, 437, 135456.       |
| Ru-H <sub>2</sub> O/CC-350                     | 1.67                       | <i>Appl. Catal. B</i> , 2022, 317, 121729.      |
| Ru <sub>1</sub> Ni <sub>1</sub> -NCNFs         | 1.564                      | <i>Adv. Sci.</i> , 2020, 7, 1901833.            |
| Ru-RuO <sub>2</sub> /Mn-doped MoO <sub>2</sub> | 1.53                       | <i>Chem. Eng. J.</i> , 2023, 468, 143760.       |
